# Supplementary material
Source: publisher site journal article supplement (https://www.dovepress.com/article/335399)
Supplement: Supplementary file 1 [file get_supplementary_file.php]

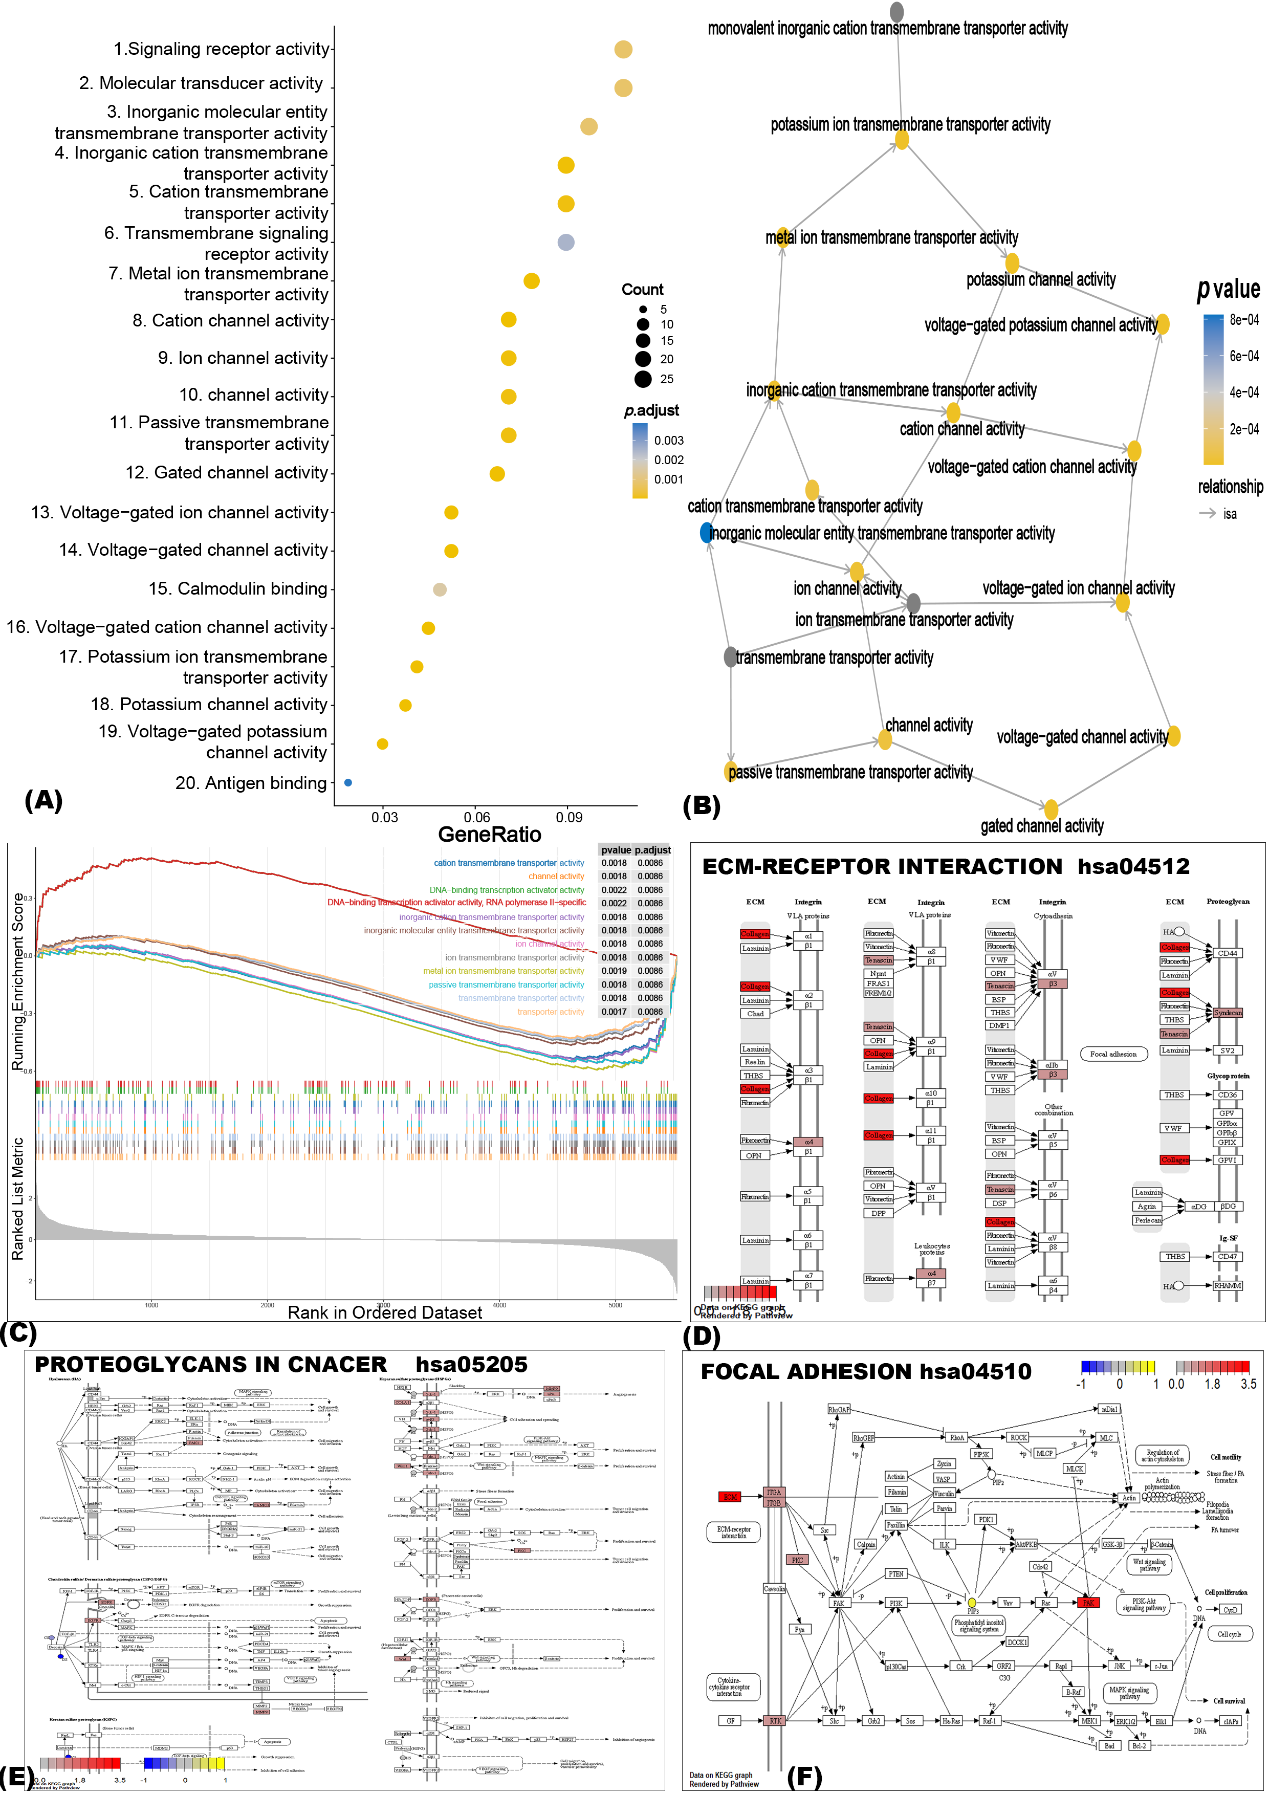


**Supplementary Figure 1 Enrichment analysis of DETFTGs. (A, B)** GO enrichment results; **(C)** GSEA result; **(D, E, F)** KEGG pathway enrichment results


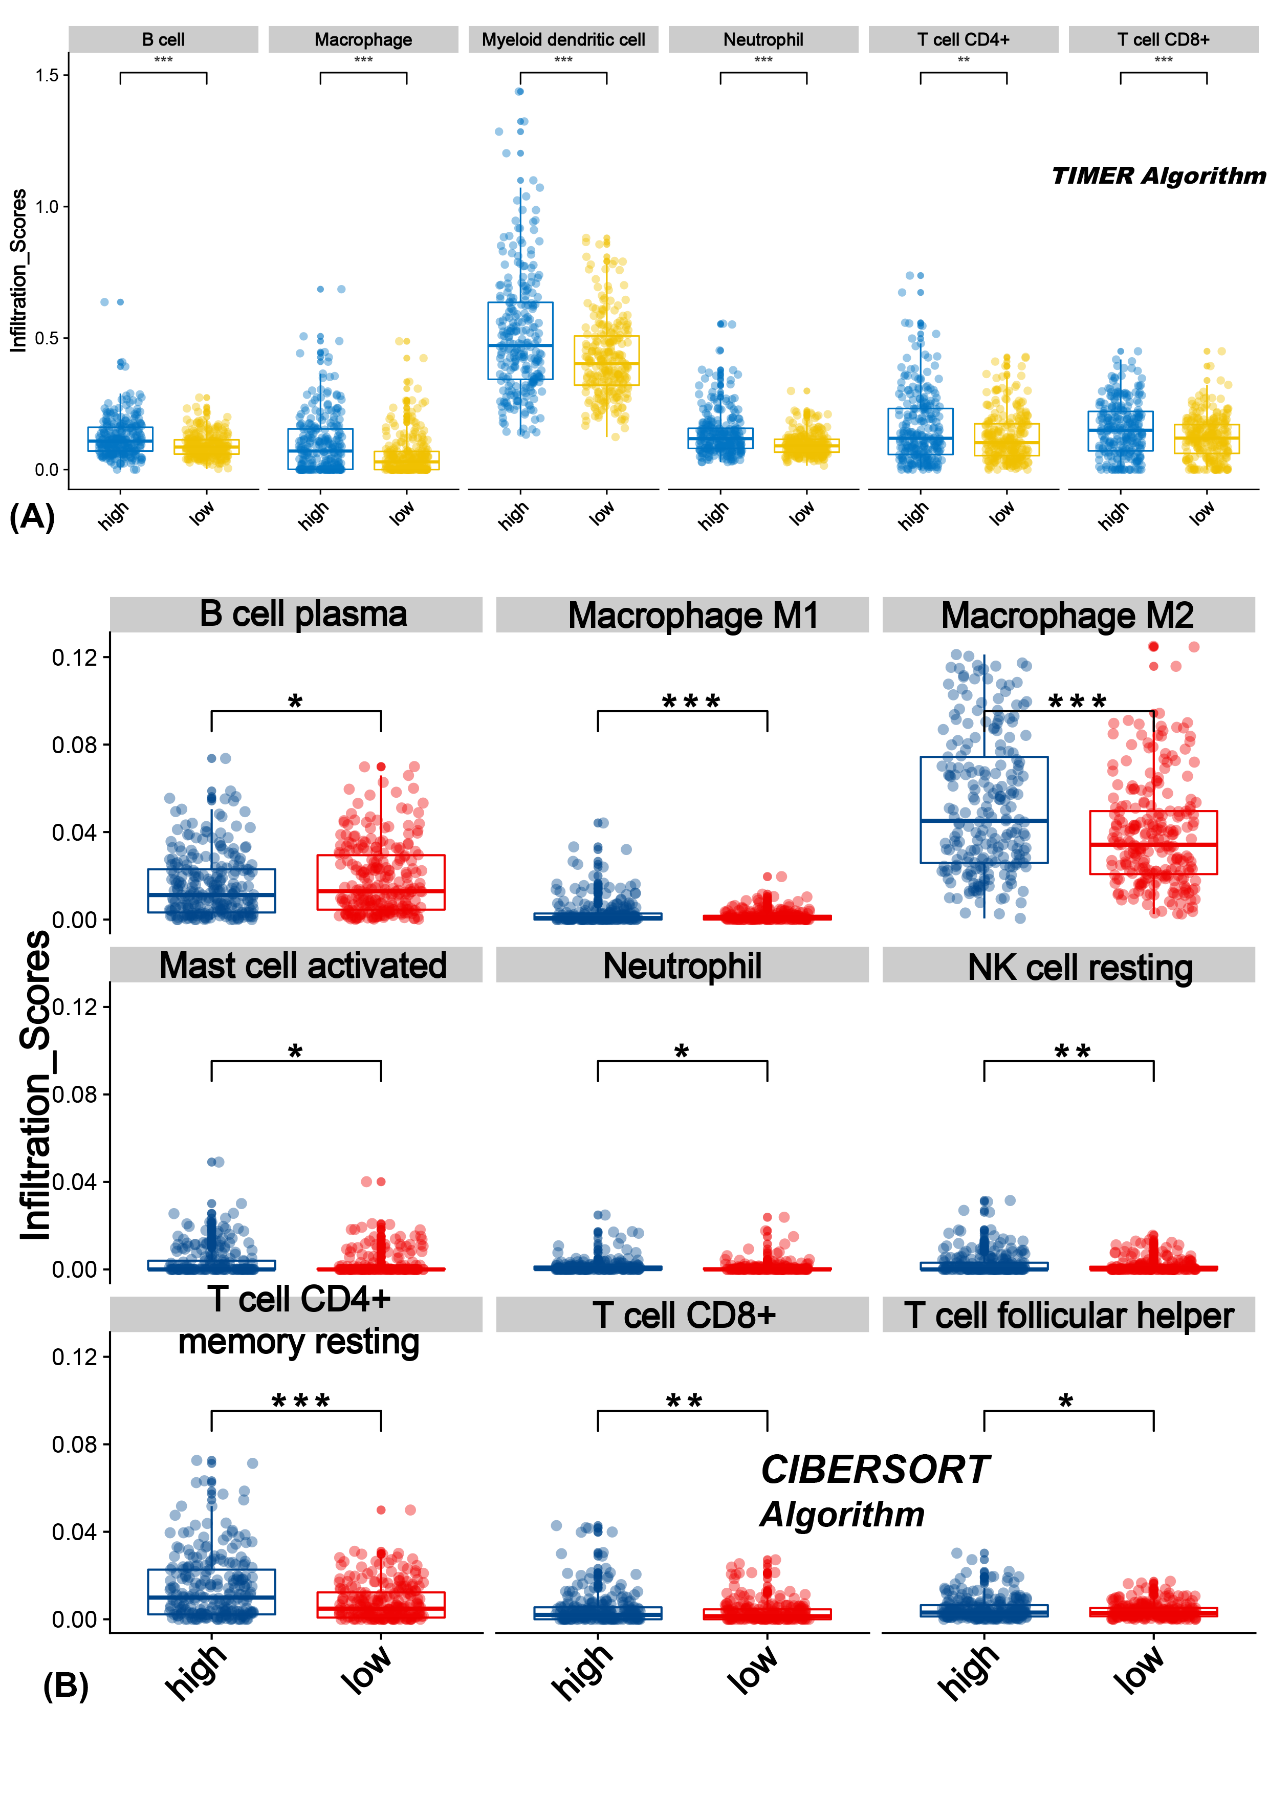


**Supplementary Figure 2 Immune infiltrating analysis between high/low-risk groups. (A, B)** Immune infiltrating analysis via TIMER algorithm (A) and CIBERSORT algorithm (B)


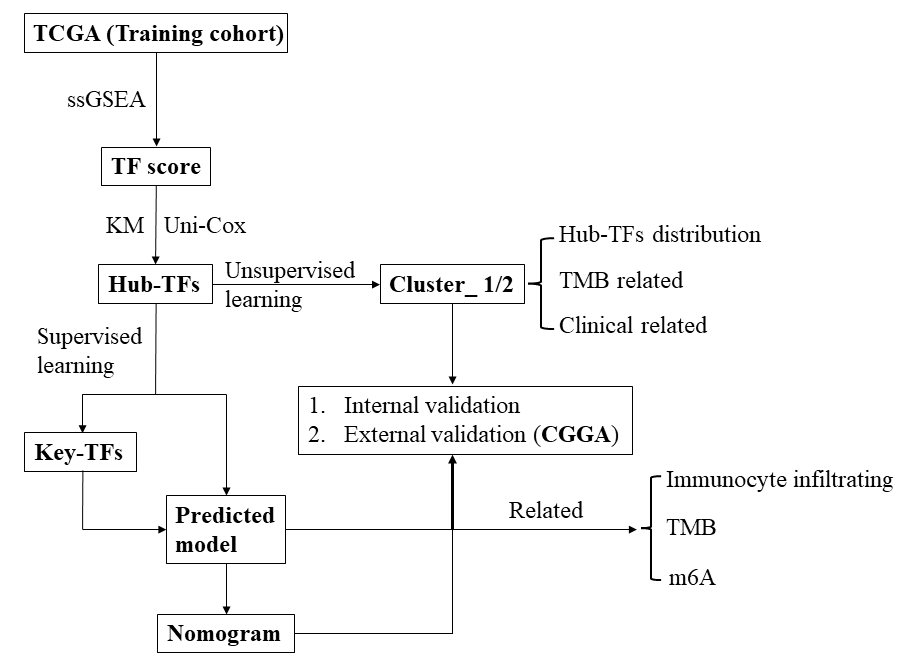


**Supplementary Figure 3 Brief workflow**

| **Reactome ID** | **Term Description** | **GeneRatio** | **BgRatio** | **p.adjust** |
| --- | --- | --- | --- | --- |
| R-HSA-112316 | Neuronal System | 24/167 | 410/10856 | 9.82E-06 |
| R-HSA-112315 | Transmission across Chemical Synapses | 14/167 | 270/10856 | 0.022168 |
| R-HSA-2500257 | Resolution of Sister Chromatid Cohesion | 9/167 | 126/10856 | 0.02859 |
| R-HSA-69618 | Mitotic Spindle Checkpoint | 8/167 | 113/10856 | 0.030701 |
| R-HSA-9609736 | Assembly and cell surface presentation of NMDA receptors | 5/167 | 41/10856 | 0.030701 |
| R-HSA-168799 | Neurotoxicity of clostridium toxins | 3/167 | 10/10856 | 0.030701 |
| R-HSA-9648025 | EML4 and NUDC in mitotic spindle formation | 8/167 | 117/10856 | 0.030701 |
| R-HSA-1296072 | Voltage gated Potassium channels | 5/167 | 43/10856 | 0.030701 |
| R-HSA-373760 | L1CAM interactions | 8/167 | 119/10856 | 0.030701 |
| R-HSA-877300 | Interferon gamma signaling | 7/167 | 91/10856 | 0.030701 |
| R-HSA-141424 | Amplification of signal from the kinetochores | 7/167 | 96/10856 | 0.03452 |
| R-HSA-141444 | Amplification of signal from unattached kinetochores via a MAD2 inhibitory signal | 7/167 | 96/10856 | 0.03452 |
| R-HSA-3000170 | Syndecan interactions | 4/167 | 27/10856 | 0.03452 |
| R-HSA-1296071 | Potassium Channels | 7/167 | 103/10856 | 0.043328 |
| R-HSA-3000178 | ECM proteoglycans | 6/167 | 76/10856 | 0.043328 |
| R-HSA-428540 | Activation of RAC1 | 3/167 | 14/10856 | 0.043328 |
| R-HSA-68877 | Mitotic Prometaphase | 10/167 | 204/10856 | 0.043328 |
| R-HSA-418594 | G alpha (i) signalling events | 13/167 | 318/10856 | 0.043328 |
| R-HSA-5663220 | RHO GTPases Activate Formins | 8/167 | 140/10856 | 0.046589 |
| R-HSA-6794361 | Neurexins and neuroligins | 5/167 | 55/10856 | 0.047328 |

**Supplementary Table Enrichment analysis of DETFTGs via Reactome database.**
